# Supplementary material for: SARS-CoV-2 Outbreak Investigation Using Contact Tracing and Whole-Genome Sequencing in an Ontario Tertiary Care Hospital
Source: PubMed Central journal article supplement (PMC10269621; doi:10.1128/spectrum.01900-22), 2023-04-24
Supplement: spectrum.01900-22-s0001.pdf [file spectrum.01900-22-s0001.pdf]

Supplementary Material

Supplementary Table 1. Characteristics about each ward between December 2020 and January 2021.

| Ward                                              | Average number of patients per month | Number of patients assigned to each HCW (day-night shift) per month | Number of rooms with one bed | Number of rooms with two beds | Number of rooms with four beds |
|---------------------------------------------------|--------------------------------------|---------------------------------------------------------------------|------------------------------|-------------------------------|--------------------------------|
| Ward A (Medicine)                                 | 28                                   | 6-7                                                                 | 4                            | 5                             | 5                              |
| Ward B (Cardiology and Medicine)                  | 10                                   | 3-6                                                                 | 9                            | 3                             | 0                              |
| Ward C (Alternate level of Care, mostly Medicine) | 23                                   | 6-7                                                                 | 4                            | 5                             | 7                              |
| Ward D (Surgery)                                  | 24                                   | 6-9                                                                 | 4                            | 3                             | 6                              |
| Ward E (Rehabilitation)                           | 18                                   | 4-6                                                                 | 9                            | 3                             | 4                              |

Supplementary Table 2. Probable and confirmed hospital-acquired infection definitions for patients and healthcare workers.

|                   | Case type                             | Case definition                                                                                                    |
|-------------------|---------------------------------------|--------------------------------------------------------------------------------------------------------------------|
| Patient           | Probable hospital-acquired infection  | Symptom onset and a positive test occurring after at least 5 days of admission with no other epidemiological links |
|                   | Confirmed hospital-acquired infection | Symptom onset and a positive test after at least 14 days of admission with no other epidemiological links          |
| Healthcare worker |                                       | Positive test and no known community exposures                                                                     |

Supplementary Table 3. Control measures implemented for patients and healthcare workers (HCWs) after an outbreak has been declared.

|                                                                                                                    | Control measure                                                                                                                                                                                                                          | Time period                                                                      |
|--------------------------------------------------------------------------------------------------------------------|------------------------------------------------------------------------------------------------------------------------------------------------------------------------------------------------------------------------------------------|----------------------------------------------------------------------------------|
| COVID positive or exposed patients                                                                                 | Droplet/contact precautions                                                                                                                                                                                                              | 14 days from their last exposure                                                 |
| Patients cared for by or had direct contact with COVID positive HCW                                                | Droplet/contact precautions                                                                                                                                                                                                              | 14 days from their last exposure                                                 |
| All patients (when COVID positive HCW spends >6 hours on unit or there is direct contact with patient/another HCW) | Point prevalence by RT-PCR                                                                                                                                                                                                               | Until no further cases are identified on two sequential point prevalence studies |
| HCW with high risk exposure (e.g., exposed to COVID positive patient without mask)                                 | Home isolation                                                                                                                                                                                                                           | 14 days                                                                          |
| HCW with medium risk exposure (e.g., exposed to COVID positive patient without eye protection)                     | Home isolation                                                                                                                                                                                                                           | Can return to work after testing negative on day 7 post exposure                 |
| HCW with low risk exposure (e.g., exposed to unmasked COVID positive patient)                                      | Daily symptom screening                                                                                                                                                                                                                  |                                                                                  |
| Visitors                                                                                                           | Only allowed for compassionate ground (e.g., imminently dying patients)                                                                                                                                                                  | Until outbreak declared over                                                     |
| Hospital                                                                                                           | <ul style="list-style-type: none"> <li>• Additional cleaning</li> <li>• Increase in hand hygiene and personal protective equipment audits</li> <li>• Universal eye protection</li> <li>• Patient masking for HCW interactions</li> </ul> | Until outbreak declared over                                                     |
